# Supplementary material for: Exploring the Microbiome of Marmara Sea Mucilage: A Shotgun Metagenomics Study
Source: Preprints.org preprint supplement (doi:10.20944/preprints202303.0290.v1), 2023-03-15
Supplement: Supplementary file 1 [file supplementary]

## Sheet: MS2
percent	reads	taxon_id	taxon_name
19224.8	2113265	1224	Proteobacteria
11239.7	1235507	976	Bacteroidetes
3130.19	344082	74201	Verrucomicrobia
2951.39	324427	203682	Planctomycetes
0.575509	63262	1117	Cyanobacteria
0.496017	54524	134625	Kiritimatiellaeota
0.431709	47455	651137	Thaumarchaeota
0.399796	43947	1239	Firmicutes
0.225502	24788	201174	Actinobacteria
0.200057	21991	928852	Candidatus Bathyarchaeota
0.189777	20861	203691	Spirochaetes
0.137905	15159	57723	Acidobacteria
0.137696	15136	256845	Lentisphaerae
0.120338	13228	200795	Chloroflexi
0.095175	10462	544448	Tenericutes
0.058222	6400	40117	Nitrospirae
0.054283	5967	142182	Gemmatimonadetes
0.053146	5842	28890	Euryarchaeota
0.039373	4328	204428	Chlamydiae
0.035543	3907	142187	Candidatus Hydrogenedentes
0.026946	2962	2283796	Candidatus Thermoplasmatota
0.021460	2359	1134404	Ignavibacteriae
0.020478	2251	200930	Deferribacteres
0.017867	1964	32066	Fusobacteria
0.016011	1760	67819	Armatimonadetes
0.015784	1735	1930617	Calditrichaeota
0.014173	1558	67812	Candidatus Omnitrophica
0.012154	1336	1293497	Nitrospinae
0.012054	1325	1936987	Balneolaeota
0.011817	1299	1936272	Candidatus Heimdallarchaeota
0.011135	1224	67817	Candidatus Aminicenantes
0.010253	1127	62680	Candidatus Marinimicrobia
0.010171	1118	456828	Candidatus Cloacimonetes
0.009525	1047	1090	Chlorobi
0.008733	960	1703755	candidate division WOR-3
0.008215	903	1752708	Candidatus Rokubacteria
0.007933	872	74152	Elusimicrobia
0.007805	858	1297	Deinococcus-Thermus
0.006996	769	1706441	Candidatus Thorarchaeota
0.006841	752	1379697	candidate division Zixibacteria
0.006050	665	74015	Candidatus Latescibacteria
0.005549	610	743724	Candidatus Aenigmarchaeota
0.005513	606	1802339	Candidatus Tectomicrobia
0.005404	594	65842	Fibrobacteres
0.005131	564	1655434	Candidatus Lokiarchaeota
0.005085	559	265317	Candidatus Poribacteria
0.005085	559	1752716	Candidatus Dadabacteria
0.004803	528	200783	Aquificae
0.004558	501	1801616	Candidatus Woesearchaeota
0.004212	463	508458	Synergistetes
0.004094	450	200918	Thermotogae
0.003921	431	1853220	Rhodothermaeota
0.003739	411	200940	Thermodesulfobacteria
0.002884	317	200938	Chrysiogenetes
0.002575	283	200295	Candidatus Sumerlaeota
0.002520	277	1752734	Candidatus Kaiserbacteria
0.002502	275	28889	Crenarchaeota
0.002411	265	1798710	Candidatus Melainabacteria
0.002411	265	1817808	Candidatus Margulisbacteria
0.002274	250	221216	Candidatus Parcubacteria
0.002192	241	1052815	Candidatus Aerophobetes
0.002083	229	1619053	Candidatus Peregrinibacteria
0.002083	229	1752722	Candidatus Woesebacteria
0.001947	214	95818	Candidatus Saccharibacteria
0.001938	213	1752737	Candidatus Moranbacteria
0.001847	203	1817801	Candidatus Eisenbacteria
0.001728	190	640293	candidate division NC10
0.001656	182	1817811	Candidatus Schekmanbacteria
0.001547	170	67818	Atribacterota
0.001519	167	363464	Candidatus Gracilibacteria
0.001483	163	1752732	Candidatus Uhrbacteria
0.001201	132	1729712	Candidatus Fermentibacteria
0.001119	123	2093358	Candidatus Abyssubacteria
0.001037	114	422282	candidate division WWE3
0.001037	114	1817812	Candidatus Wallbacteria
0.001019	112	1817798	Candidatus Delongbacteria
0.000973	107	1817810	Candidatus Riflebacteria
0.000910	100	1752723	Candidatus Roizmanbacteria
0.000901	99	1752731	Candidatus Magasanikbacteria
0.000873	96	1752728	Candidatus Falkowbacteria
0.000837	92	221235	Candidatus Absconditabacteria
0.000810	89	1817806	Candidatus Handelsmanbacteria
0.000755	83	1752729	Candidatus Nomurabacteria
0.000691	76	67810	Candidatus Bipolaricaulota
0.000655	72	1752733	Candidatus Yanofskybacteria
0.000655	72	1817809	Candidatus Raymondbacteria
0.000564	62	51967	Candidatus Korarchaeota
0.000564	62	1819803	Candidatus Desantisbacteria
0.000555	61	1817903	Candidatus Buchananbacteria
0.000546	60	2767197	Candidatus Muirbacteria
0.000546	60	2798537	Candidatus Blackallbacteria
0.000537	59	1752735	Candidatus Wolfebacteria
0.000537	59	2093364	Candidatus Aureabacteria
0.000528	58	1752719	Candidatus Levybacteria
0.000528	58	1817797	Candidatus Coatesbacteria
0.000473	52	1662329	Candidatus Kapabacteria
0.000455	50	1817805	Candidatus Glassbacteria
0.000446	49	1752720	Candidatus Gottesmanbacteria
0.000428	47	1752724	Candidatus Pacebacteria
0.000418	46	1817907	Candidatus Kerfeldbacteria
0.000409	45	67814	Caldiserica
0.000400	44	1817807	Candidatus Lindowbacteria
0.000373	41	1618330	Candidatus Berkelbacteria
0.000364	40	1752718	Candidatus Daviesbacteria
0.000346	38	1817911	Candidatus Nealsonbacteria
0.000337	37	2576005	candidate division LCP-89
0.000328	36	2582935	Candidatus Altiarchaeota
0.000309	34	1817802	Candidatus Firestonebacteria
0.000300	33	1801631	Candidatus Micrarchaeota
0.000300	33	1817916	Candidatus Staskawiczbacteria
0.000273	30	192989	Nanoarchaeota
0.000273	30	1752727	Candidatus Campbellbacteria
0.000264	29	1855361	Candidatus Kryptonia
0.000255	28	1817925	Candidatus Zambryskibacteria
0.000255	28	1915410	Candidatus Verstraetearchaeota
0.000246	27	1752721	Candidatus Shapirobacteria
0.000227	25	1817899	Candidatus Woykebacteria
0.000218	24	743725	Candidatus Diapherotrites
0.000218	24	1817799	Candidatus Doudnabacteria
0.000218	24	2109258	Abditibacteriota
0.000200	22	1154676	Candidatus Eremiobacteraeota
0.000200	22	1618338	candidate division CPR1
0.000191	21	68297	Dictyoglomi
0.000182	20	1130266	Candidatus Hydrothermae
0.000182	20	1752717	Candidatus Curtissbacteria
0.000182	20	1817800	Candidatus Edwardsbacteria
0.000173	19	1817803	Candidatus Fischerbacteria
0.000173	19	2052312	Candidatus Dormibacteraeota
0.000164	18	1817919	Candidatus Taylorbacteria
0.000155	17	1752738	Candidatus Giovannonibacteria
0.000146	16	1817909	Candidatus Liptonbacteria
0.000146	16	2703810	Candidatus Mcinerneyibacteriota
0.000136	15	1752730	Candidatus Amesbacteria
0.000136	15	1817908	Candidatus Komeilibacteria
0.000136	15	1817914	Candidatus Ryanbacteria
0.000127	14	67820	Candidatus Microgenomates
0.000118	13	1752725	Candidatus Collierbacteria
0.000118	13	1817920	Candidatus Terrybacteria
0.000118	13	1817924	Candidatus Yonathbacteria
0.000118	13	2013583	Candidatus Goldbacteria
0.000109	12	1752736	Candidatus Adlerbacteria
0.000109	12	1817905	Candidatus Harrisonbacteria
0.000109	12	2138240	Coprothermobacterota
0.000100	11	1752726	Candidatus Beckwithbacteria
0.000100	11	1752740	Candidatus Kuenenbacteria
0.000100	11	1817910	Candidatus Lloydbacteria
0.000100	11	1817922	Candidatus Vogelbacteria
0.000091	10	1618340	candidate division CPR3
0.000091	10	1752741	Candidatus Azambacteria
0.000091	10	1817804	Candidatus Fraserbacteria
0.000091	10	1817912	Candidatus Niyogibacteria
0.000091	10	1817913	Candidatus Portnoybacteria
0.000082	9	1817904	Candidatus Colwellbacteria
0.000082	9	1936271	Candidatus Odinarchaeota
0.000082	9	2498705	Candidatus Cryosericota
0.000073	8	1618339	candidate division CPR2
0.000073	8	1817917	Candidatus Sungbacteria
0.000073	8	1817923	Candidatus Wildermuthbacteria
0.000073	8	1817926	Candidatus Wirthbacteria
0.000073	8	2798536	Candidatus Gribaldobacteria
0.000064	7	1462430	Candidatus Nanohaloarchaeota
0.000064	7	1752739	Candidatus Jorgensenbacteria
0.000055	6	1817900	Candidatus Chisholmbacteria
0.000055	6	1817918	Candidatus Tagabacteria
0.000055	6	1935021	Candidatus Geothermarchaeota
0.000045	5	1817915	Candidatus Spechtbacteria
0.000045	5	1935019	Candidatus Hydrothermarchaeota
0.000036	4	1704031	candidate division KD3-62
0.000027	3	1817898	Candidatus Blackburnbacteria
0.000027	3	1817901	Candidatus Andersenbacteria
0.000027	3	1978152	Candidatus Marsarchaeota
0.000027	3	2546568	Candidatus Nezhaarchaeota
0.000018	2	2301208	Candidatus Cerribacteria
1805717	198491	10239	Viruses
0.957010	105198	NA	cannot be assigned to a (non-viral) phylum
57052070	6271370	NA	unclassified

## Sheet: MS3
percent	reads	taxon_id	taxon_name
35258.8	11261937	1224	Proteobacteria
6227.41	1989087	976	Bacteroidetes
1579.37	504462	203682	Planctomycetes
0.962117	307308	74201	Verrucomicrobia
0.609264	194604	1117	Cyanobacteria
0.511374	163337	1239	Firmicutes
0.473053	151097	203691	Spirochaetes
0.469321	149905	201174	Actinobacteria
0.170694	54521	134625	Kiritimatiellaeota
0.124252	39687	544448	Tenericutes
0.072656	23207	57723	Acidobacteria
0.067400	21528	200795	Chloroflexi
0.049827	15915	32066	Fusobacteria
0.035935	11478	256845	Lentisphaerae
0.029858	9537	28890	Euryarchaeota
0.025431	8123	40117	Nitrospirae
0.023490	7503	204428	Chlamydiae
0.019232	6143	142182	Gemmatimonadetes
0.019067	6090	928852	Candidatus Bathyarchaeota
0.014298	4567	200930	Deferribacteres
0.013766	4397	1936987	Balneolaeota
0.013563	4332	1134404	Ignavibacteriae
0.012623	4032	508458	Synergistetes
0.010782	3444	1930617	Calditrichaeota
0.009912	3166	67812	Candidatus Omnitrophica
0.009561	3054	1297	Deinococcus-Thermus
0.008447	2698	67819	Armatimonadetes
0.007486	2391	74152	Elusimicrobia
0.007458	2382	1090	Chlorobi
0.006139	1961	2283796	Candidatus Thermoplasmatota
0.005908	1887	62680	Candidatus Marinimicrobia
0.005876	1877	1752708	Candidatus Rokubacteria
0.005745	1835	1293497	Nitrospinae
0.005404	1726	200918	Thermotogae
0.005194	1659	456828	Candidatus Cloacimonetes
0.005078	1622	1379697	candidate division Zixibacteria
0.004439	1418	200940	Thermodesulfobacteria
0.004342	1387	651137	Thaumarchaeota
0.004283	1368	200783	Aquificae
0.004151	1326	1853220	Rhodothermaeota
0.004117	1315	67817	Candidatus Aminicenantes
0.004073	1301	1752716	Candidatus Dadabacteria
0.003785	1209	142187	Candidatus Hydrogenedentes
0.003751	1198	1802339	Candidatus Tectomicrobia
0.003099	990	1798710	Candidatus Melainabacteria
0.003009	961	65842	Fibrobacteres
0.003006	960	265317	Candidatus Poribacteria
0.002736	874	74015	Candidatus Latescibacteria
0.002595	829	1619053	Candidatus Peregrinibacteria
0.002311	738	743724	Candidatus Aenigmarchaeota
0.002173	694	1817808	Candidatus Margulisbacteria
0.002129	680	200938	Chrysiogenetes
0.002073	662	1752734	Candidatus Kaiserbacteria
0.001966	628	200295	Candidatus Sumerlaeota
0.001935	618	51967	Candidatus Korarchaeota
0.001788	571	67818	Atribacterota
0.001697	542	95818	Candidatus Saccharibacteria
0.001694	541	221216	Candidatus Parcubacteria
0.001540	492	1052815	Candidatus Aerophobetes
0.001515	484	1801616	Candidatus Woesearchaeota
0.001409	450	1752737	Candidatus Moranbacteria
0.001371	438	1655434	Candidatus Lokiarchaeota
0.001365	436	1817801	Candidatus Eisenbacteria
0.001334	426	1703755	candidate division WOR-3
0.001249	399	1936272	Candidatus Heimdallarchaeota
0.001237	395	1752731	Candidatus Magasanikbacteria
0.001205	385	1706441	Candidatus Thorarchaeota
0.001152	368	640293	candidate division NC10
0.001080	345	28889	Crenarchaeota
0.001036	331	1729712	Candidatus Fermentibacteria
0.001024	327	1752732	Candidatus Uhrbacteria
0.000955	305	1752728	Candidatus Falkowbacteria
0.000936	299	1817810	Candidatus Riflebacteria
0.000927	296	2798537	Candidatus Blackallbacteria
0.000899	287	1817812	Candidatus Wallbacteria
0.000783	250	1817811	Candidatus Schekmanbacteria
0.000639	204	1752723	Candidatus Roizmanbacteria
0.000592	189	422282	candidate division WWE3
0.000573	183	67810	Candidatus Bipolaricaulota
0.000570	182	1662329	Candidatus Kapabacteria
0.000542	173	2093358	Candidatus Abyssubacteria
0.000526	168	1618330	Candidatus Berkelbacteria
0.000523	167	1752722	Candidatus Woesebacteria
0.000520	166	1752719	Candidatus Levybacteria
0.000501	160	1752729	Candidatus Nomurabacteria
0.000495	158	1752720	Candidatus Gottesmanbacteria
0.000476	152	1817809	Candidatus Raymondbacteria
0.000463	148	363464	Candidatus Gracilibacteria
0.000463	148	1817911	Candidatus Nealsonbacteria
0.000460	147	221235	Candidatus Absconditabacteria
0.000448	143	1752724	Candidatus Pacebacteria
0.000441	141	1817797	Candidatus Coatesbacteria
0.000438	140	1817806	Candidatus Handelsmanbacteria
0.000429	137	1752733	Candidatus Yanofskybacteria
0.000379	121	1817805	Candidatus Glassbacteria
0.000376	120	1817903	Candidatus Buchananbacteria
0.000369	118	1855361	Candidatus Kryptonia
0.000348	111	1817908	Candidatus Komeilibacteria
0.000326	104	1817807	Candidatus Lindowbacteria
0.000322	103	2093364	Candidatus Aureabacteria
0.000319	102	2703810	Candidatus Mcinerneyibacteriota
0.000316	101	1819803	Candidatus Desantisbacteria
0.000313	100	2582935	Candidatus Altiarchaeota
0.000307	98	1817802	Candidatus Firestonebacteria
0.000304	97	1801631	Candidatus Micrarchaeota
0.000282	90	67814	Caldiserica
0.000279	89	1618340	candidate division CPR3
0.000266	85	2109258	Abditibacteriota
0.000238	76	2052312	Candidatus Dormibacteraeota
0.000232	74	1752718	Candidatus Daviesbacteria
0.000225	72	1154676	Candidatus Eremiobacteraeota
0.000219	70	1130266	Candidatus Hydrothermae
0.000216	69	1817910	Candidatus Lloydbacteria
0.000213	68	1752735	Candidatus Wolfebacteria
0.000213	68	1817798	Candidatus Delongbacteria
0.000213	68	1817799	Candidatus Doudnabacteria
0.000210	67	1817916	Candidatus Staskawiczbacteria
0.000204	65	2767197	Candidatus Muirbacteria
0.000197	63	68297	Dictyoglomi
0.000197	63	1817919	Candidatus Taylorbacteria
0.000191	61	1817907	Candidatus Kerfeldbacteria
0.000185	59	1752727	Candidatus Campbellbacteria
0.000185	59	1817905	Candidatus Harrisonbacteria
0.000166	53	1752730	Candidatus Amesbacteria
0.000163	52	2498705	Candidatus Cryosericota
0.000153	49	1817800	Candidatus Edwardsbacteria
0.000150	48	2576005	candidate division LCP-89
0.000147	47	1752721	Candidatus Shapirobacteria
0.000138	44	1752717	Candidatus Curtissbacteria
0.000138	44	1817925	Candidatus Zambryskibacteria
0.000135	43	1817803	Candidatus Fischerbacteria
0.000128	41	743725	Candidatus Diapherotrites
0.000128	41	1752738	Candidatus Giovannonibacteria
0.000128	41	1817913	Candidatus Portnoybacteria
0.000122	39	1752725	Candidatus Collierbacteria
0.000119	38	1618339	candidate division CPR2
0.000119	38	1915410	Candidatus Verstraetearchaeota
0.000116	37	67820	Candidatus Microgenomates
0.000116	37	1817901	Candidatus Andersenbacteria
0.000113	36	1752726	Candidatus Beckwithbacteria
0.000113	36	1817909	Candidatus Liptonbacteria
0.000113	36	2138240	Coprothermobacterota
0.000106	34	1817923	Candidatus Wildermuthbacteria
0.000103	33	2013583	Candidatus Goldbacteria
0.000100	32	1817912	Candidatus Niyogibacteria
0.000097	31	1817915	Candidatus Spechtbacteria
0.000097	31	1817917	Candidatus Sungbacteria
0.000097	31	1817922	Candidatus Vogelbacteria
0.000091	29	1618338	candidate division CPR1
0.000091	29	1817926	Candidatus Wirthbacteria
0.000081	26	1817804	Candidatus Fraserbacteria
0.000078	25	1752739	Candidatus Jorgensenbacteria
0.000075	24	1817904	Candidatus Colwellbacteria
0.000072	23	192989	Nanoarchaeota
0.000072	23	1817914	Candidatus Ryanbacteria
0.000066	21	1752736	Candidatus Adlerbacteria
0.000063	20	1752740	Candidatus Kuenenbacteria
0.000063	20	1817920	Candidatus Terrybacteria
0.000059	19	1817924	Candidatus Yonathbacteria
0.000053	17	1752741	Candidatus Azambacteria
0.000053	17	1817918	Candidatus Tagabacteria
0.000053	17	2798536	Candidatus Gribaldobacteria
0.000050	16	1978152	Candidatus Marsarchaeota
0.000047	15	1817796	Candidatus Abawacabacteria
0.000047	15	1817900	Candidatus Chisholmbacteria
0.000038	12	1817899	Candidatus Woykebacteria
0.000034	11	1704031	candidate division KD3-62
0.000025	8	1462422	Candidatus Parvarchaeota
0.000025	8	2546568	Candidatus Nezhaarchaeota
0.000022	7	1935019	Candidatus Hydrothermarchaeota
0.000022	7	1936271	Candidatus Odinarchaeota
0.000019	6	1817898	Candidatus Blackburnbacteria
0.000016	5	1462430	Candidatus Nanohaloarchaeota
0.000016	5	1817902	Candidatus Brennerbacteria
0.000013	4	1817906	Candidatus Jacksonbacteria
0.000013	4	1935021	Candidatus Geothermarchaeota
0.000013	4	2301208	Candidatus Cerribacteria
0.547049	174732	10239	Viruses
0.787556	251552	NA	cannot be assigned to a (non-viral) phylum
51682264	16507738	NA	unclassified

## Sheet: MS4
percent	reads	taxon_id	taxon_name
11136.5	1263545	1224	Proteobacteria
4868.84	552416	1239	Firmicutes
3739.07	424233	201174	Actinobacteria
0.621182	70479	976	Bacteroidetes
0.344546	39092	1117	Cyanobacteria
0.193875	21997	204428	Chlamydiae
0.122872	13941	203691	Spirochaetes
0.069531	7889	32066	Fusobacteria
0.069285	7861	28890	Euryarchaeota
0.029975	3401	203682	Planctomycetes
0.020474	2323	28889	Crenarchaeota
0.013388	1519	74201	Verrucomicrobia
0.012216	1386	2283796	Candidatus Thermoplasmatota
0.007033	798	200795	Chloroflexi
0.006928	786	95818	Candidatus Saccharibacteria
0.005817	660	651137	Thaumarchaeota
0.003217	365	57723	Acidobacteria
0.003067	348	544448	Tenericutes
0.002671	303	1297	Deinococcus-Thermus
0.001983	225	142182	Gemmatimonadetes
0.001146	130	40117	Nitrospirae
0.001014	115	1936987	Balneolaeota
0.000811	92	508458	Synergistetes
0.000687	78	1752734	Candidatus Kaiserbacteria
0.000643	73	1752708	Candidatus Rokubacteria
0.000476	54	1855361	Candidatus Kryptonia
0.000449	51	256845	Lentisphaerae
0.000379	43	1090	Chlorobi
0.000370	42	221235	Candidatus Absconditabacteria
0.000361	41	1798710	Candidatus Melainabacteria
0.000344	39	65842	Fibrobacteres
0.000326	37	1752717	Candidatus Curtissbacteria
0.000317	36	134625	Kiritimatiellaeota
0.000300	34	1379697	candidate division Zixibacteria
0.000282	32	1802339	Candidatus Tectomicrobia
0.000273	31	67812	Candidatus Omnitrophica
0.000264	30	1853220	Rhodothermaeota
0.000247	28	363464	Candidatus Gracilibacteria
0.000220	25	1134404	Ignavibacteriae
0.000212	24	1752733	Candidatus Yanofskybacteria
0.000203	23	67817	Candidatus Aminicenantes
0.000203	23	200930	Deferribacteres
0.000176	20	67819	Armatimonadetes
0.000176	20	74152	Elusimicrobia
0.000167	19	1655434	Candidatus Lokiarchaeota
0.000167	19	1930617	Calditrichaeota
0.000159	18	221216	Candidatus Parcubacteria
0.000141	16	1817801	Candidatus Eisenbacteria
0.000123	14	1752716	Candidatus Dadabacteria
0.000123	14	1752730	Candidatus Amesbacteria
0.000123	14	2582935	Candidatus Altiarchaeota
0.000115	13	1293497	Nitrospinae
0.000106	12	1978152	Candidatus Marsarchaeota
0.000097	11	1817812	Candidatus Wallbacteria
0.000079	9	422282	candidate division WWE3
0.000071	8	1817911	Candidatus Nealsonbacteria
0.000071	8	1936272	Candidatus Heimdallarchaeota
0.000062	7	67810	Candidatus Bipolaricaulota
0.000062	7	1619053	Candidatus Peregrinibacteria
0.000062	7	1752739	Candidatus Jorgensenbacteria
0.000053	6	62680	Candidatus Marinimicrobia
0.000053	6	142187	Candidatus Hydrogenedentes
0.000044	5	1752732	Candidatus Uhrbacteria
0.000044	5	1817920	Candidatus Terrybacteria
0.000018	2	67818	Atribacterota
0.000009	1	74015	Candidatus Latescibacteria
0.000009	1	200918	Thermotogae
0.000009	1	1752719	Candidatus Levybacteria
0.000009	1	1752724	Candidatus Pacebacteria
0.000009	1	1752729	Candidatus Nomurabacteria
0.000009	1	1817811	Candidatus Schekmanbacteria
0.000009	1	1817901	Candidatus Andersenbacteria
0.000009	1	1817909	Candidatus Liptonbacteria
0.000009	1	1817916	Candidatus Staskawiczbacteria
0.099974	11343	10239	Viruses
4501816	510774	NA	cannot be assigned to a (non-viral) phylum
74113822	8408921	NA	unclassified

## Sheet: MS5
percent	reads	taxon_id	taxon_name
13976.5	1517443	1224	Proteobacteria
13097.5	1422013	976	Bacteroidetes
5948.68	645856	74201	Verrucomicrobia
2415.42	262246	203682	Planctomycetes
2060.69	223732	544448	Tenericutes
1063.47	115462	1239	Firmicutes
0.612371	66486	1117	Cyanobacteria
0.357746	38841	203691	Spirochaetes
0.249863	27128	256845	Lentisphaerae
0.231654	25151	201174	Actinobacteria
0.220841	23977	57723	Acidobacteria
0.217958	23664	200795	Chloroflexi
0.153807	16699	1134404	Ignavibacteriae
0.149211	16200	134625	Kiritimatiellaeota
0.119599	12985	651137	Thaumarchaeota
0.073104	7937	28890	Euryarchaeota
0.058901	6395	1930617	Calditrichaeota
0.058109	6309	67812	Candidatus Omnitrophica
0.056387	6122	142182	Gemmatimonadetes
0.055282	6002	456828	Candidatus Cloacimonetes
0.052343	5683	40117	Nitrospirae
0.044275	4807	2283796	Candidatus Thermoplasmatota
0.040913	4442	928852	Candidatus Bathyarchaeota
0.040563	4404	204428	Chlamydiae
0.036566	3970	62680	Candidatus Marinimicrobia
0.034576	3754	67817	Candidatus Aminicenantes
0.029796	3235	142187	Candidatus Hydrogenedentes
0.027972	3037	32066	Fusobacteria
0.022943	2491	1936987	Balneolaeota
0.020530	2229	1090	Chlorobi
0.020401	2215	1936272	Candidatus Heimdallarchaeota
0.020337	2208	1706441	Candidatus Thorarchaeota
0.019812	2151	1379697	candidate division Zixibacteria
0.017279	1876	1293497	Nitrospinae
0.016155	1754	1655434	Candidatus Lokiarchaeota
0.015667	1701	67819	Armatimonadetes
0.014691	1595	74152	Elusimicrobia
0.010970	1191	1752716	Candidatus Dadabacteria
0.010325	1121	1297	Deinococcus-Thermus
0.009892	1074	200918	Thermotogae
0.009708	1054	1752708	Candidatus Rokubacteria
0.009579	1040	74015	Candidatus Latescibacteria
0.009551	1037	1798710	Candidatus Melainabacteria
0.008170	887	200930	Deferribacteres
0.007829	850	65842	Fibrobacteres
0.007783	845	265317	Candidatus Poribacteria
0.007764	843	1703755	candidate division WOR-3
0.007157	777	508458	Synergistetes
0.006963	756	1802339	Candidatus Tectomicrobia
0.006705	728	1817808	Candidatus Margulisbacteria
0.006512	707	200783	Aquificae
0.006392	694	200940	Thermodesulfobacteria
0.006143	667	1853220	Rhodothermaeota
0.005480	595	200295	Candidatus Sumerlaeota
0.005038	547	1729712	Candidatus Fermentibacteria
0.004439	482	200938	Chrysiogenetes
0.004357	473	67818	Atribacterota
0.003961	430	1817810	Candidatus Riflebacteria
0.003629	394	1619053	Candidatus Peregrinibacteria
0.003528	383	1052815	Candidatus Aerophobetes
0.002966	322	1752722	Candidatus Woesebacteria
0.002957	321	1817801	Candidatus Eisenbacteria
0.002874	312	221216	Candidatus Parcubacteria
0.002809	305	743724	Candidatus Aenigmarchaeota
0.002745	298	1801616	Candidatus Woesearchaeota
0.002607	283	95818	Candidatus Saccharibacteria
0.002468	268	1817798	Candidatus Delongbacteria
0.002422	263	640293	candidate division NC10
0.002284	248	1752731	Candidatus Magasanikbacteria
0.002238	243	1817811	Candidatus Schekmanbacteria
0.002229	242	1752732	Candidatus Uhrbacteria
0.002211	240	28889	Crenarchaeota
0.002211	240	2093358	Candidatus Abyssubacteria
0.002091	227	1817809	Candidatus Raymondbacteria
0.002072	225	1817812	Candidatus Wallbacteria
0.001980	215	1752737	Candidatus Moranbacteria
0.001888	205	1752728	Candidatus Falkowbacteria
0.001612	175	2093364	Candidatus Aureabacteria
0.001483	161	1817797	Candidatus Coatesbacteria
0.001446	157	1662329	Candidatus Kapabacteria
0.001409	153	1752734	Candidatus Kaiserbacteria
0.001382	150	2582935	Candidatus Altiarchaeota
0.001336	145	1817806	Candidatus Handelsmanbacteria
0.001317	143	1817805	Candidatus Glassbacteria
0.001271	138	422282	candidate division WWE3
0.001271	138	2798537	Candidatus Blackallbacteria
0.001216	132	2576005	candidate division LCP-89
0.001188	129	67814	Caldiserica
0.001133	123	1752723	Candidatus Roizmanbacteria
0.001050	114	1819803	Candidatus Desantisbacteria
0.001041	113	67810	Candidatus Bipolaricaulota
0.001041	113	363464	Candidatus Gracilibacteria
0.001041	113	1855361	Candidatus Kryptonia
0.001004	109	1817911	Candidatus Nealsonbacteria
0.000995	108	1752729	Candidatus Nomurabacteria
0.000949	103	1817802	Candidatus Firestonebacteria
0.000801	87	2767197	Candidatus Muirbacteria
0.000746	81	1752724	Candidatus Pacebacteria
0.000728	79	1130266	Candidatus Hydrothermae
0.000682	74	1752720	Candidatus Gottesmanbacteria
0.000682	74	1817807	Candidatus Lindowbacteria
0.000672	73	1752733	Candidatus Yanofskybacteria
0.000608	66	1752735	Candidatus Wolfebacteria
0.000599	65	1618330	Candidatus Berkelbacteria
0.000599	65	1801631	Candidatus Micrarchaeota
0.000599	65	1817803	Candidatus Fischerbacteria
0.000580	63	51967	Candidatus Korarchaeota
0.000562	61	1817800	Candidatus Edwardsbacteria
0.000543	59	1618338	candidate division CPR1
0.000470	51	68297	Dictyoglomi
0.000470	51	1752719	Candidatus Levybacteria
0.000461	50	1752721	Candidatus Shapirobacteria
0.000461	50	1817903	Candidatus Buchananbacteria
0.000442	48	1752730	Candidatus Amesbacteria
0.000442	48	2013583	Candidatus Goldbacteria
0.000405	44	1817907	Candidatus Kerfeldbacteria
0.000405	44	2703810	Candidatus Mcinerneyibacteriota
0.000396	43	1817916	Candidatus Staskawiczbacteria
0.000387	42	1752717	Candidatus Curtissbacteria
0.000378	41	1752718	Candidatus Daviesbacteria
0.000368	40	2498705	Candidatus Cryosericota
0.000359	39	221235	Candidatus Absconditabacteria
0.000341	37	2109258	Abditibacteriota
0.000332	36	2052312	Candidatus Dormibacteraeota
0.000313	34	1817910	Candidatus Lloydbacteria
0.000304	33	1817925	Candidatus Zambryskibacteria
0.000295	32	1154676	Candidatus Eremiobacteraeota
0.000286	31	67820	Candidatus Microgenomates
0.000276	30	1817799	Candidatus Doudnabacteria
0.000267	29	1817904	Candidatus Colwellbacteria
0.000267	29	1817905	Candidatus Harrisonbacteria
0.000267	29	1817908	Candidatus Komeilibacteria
0.000267	29	1817913	Candidatus Portnoybacteria
0.000258	28	1752727	Candidatus Campbellbacteria
0.000258	28	1915410	Candidatus Verstraetearchaeota
0.000249	27	1817919	Candidatus Taylorbacteria
0.000249	27	1817922	Candidatus Vogelbacteria
0.000239	26	1618339	candidate division CPR2
0.000239	26	1752726	Candidatus Beckwithbacteria
0.000239	26	1817914	Candidatus Ryanbacteria
0.000203	22	1817912	Candidatus Niyogibacteria
0.000193	21	1752725	Candidatus Collierbacteria
0.000184	20	192989	Nanoarchaeota
0.000184	20	743725	Candidatus Diapherotrites
0.000184	20	1817899	Candidatus Woykebacteria
0.000184	20	1817917	Candidatus Sungbacteria
0.000175	19	1752741	Candidatus Azambacteria
0.000175	19	1817924	Candidatus Yonathbacteria
0.000166	18	1817923	Candidatus Wildermuthbacteria
0.000166	18	2138240	Coprothermobacterota
0.000157	17	1752740	Candidatus Kuenenbacteria
0.000147	16	1752738	Candidatus Giovannonibacteria
0.000129	14	1462430	Candidatus Nanohaloarchaeota
0.000129	14	1752739	Candidatus Jorgensenbacteria
0.000129	14	1817898	Candidatus Blackburnbacteria
0.000129	14	1817901	Candidatus Andersenbacteria
0.000111	12	1817796	Candidatus Abawacabacteria
0.000101	11	1817804	Candidatus Fraserbacteria
0.000101	11	1978152	Candidatus Marsarchaeota
0.000092	10	1704031	candidate division KD3-62
0.000092	10	1935019	Candidatus Hydrothermarchaeota
0.000083	9	1817915	Candidatus Spechtbacteria
0.000083	9	2798536	Candidatus Gribaldobacteria
0.000074	8	1618340	candidate division CPR3
0.000074	8	1817909	Candidatus Liptonbacteria
0.000074	8	1817918	Candidatus Tagabacteria
0.000064	7	1817926	Candidatus Wirthbacteria
0.000064	7	2546568	Candidatus Nezhaarchaeota
0.000055	6	1936271	Candidatus Odinarchaeota
0.000046	5	1462422	Candidatus Parvarchaeota
0.000046	5	1752736	Candidatus Adlerbacteria
0.000046	5	1935021	Candidatus Geothermarchaeota
0.000037	4	1817906	Candidatus Jacksonbacteria
0.000037	4	1817920	Candidatus Terrybacteria
0.000037	4	2301208	Candidatus Cerribacteria
0.000028	3	1817900	Candidatus Chisholmbacteria
0.000028	3	1817902	Candidatus Brennerbacteria
0.000028	3	2582950	Candidatus Huberarchaea
0.000009	1	1817921	Candidatus Veblenbacteria
0.633261	68754	10239	Viruses
1412794	153389	NA	cannot be assigned to a (non-viral) phylum
56053150	6085769	NA	unclassified

## Sheet: MS6
percent	reads	taxon_id	taxon_name
41754.7	4874329	1224	Proteobacteria
6705.75	782811	976	Bacteroidetes
2712.54	316654	203682	Planctomycetes
1620.95	189225	1117	Cyanobacteria
1288.23	150384	201174	Actinobacteria
0.820390	95770	74201	Verrucomicrobia
0.332696	38838	1239	Firmicutes
0.185339	21636	200795	Chloroflexi
0.081182	9477	57723	Acidobacteria
0.030813	3597	1853220	Rhodothermaeota
0.028594	3338	28890	Euryarchaeota
0.019779	2309	204428	Chlamydiae
0.016387	1913	203691	Spirochaetes
0.015788	1843	40117	Nitrospirae
0.015316	1788	142182	Gemmatimonadetes
0.013046	1523	1936987	Balneolaeota
0.012832	1498	256845	Lentisphaerae
0.011676	1363	1297	Deinococcus-Thermus
0.011282	1317	134625	Kiritimatiellaeota
0.010836	1265	67819	Armatimonadetes
0.009072	1059	2283796	Candidatus Thermoplasmatota
0.008772	1024	1134404	Ignavibacteriae
0.006647	776	1752708	Candidatus Rokubacteria
0.005448	636	1930617	Calditrichaeota
0.005371	627	67812	Candidatus Omnitrophica
0.004891	571	1752737	Candidatus Moranbacteria
0.004694	548	651137	Thaumarchaeota
0.004497	525	1090	Chlorobi
0.004497	525	1802339	Candidatus Tectomicrobia
0.004326	505	928852	Candidatus Bathyarchaeota
0.003958	462	32066	Fusobacteria
0.003795	443	265317	Candidatus Poribacteria
0.003701	432	74152	Elusimicrobia
0.003624	423	508458	Synergistetes
0.003624	423	544448	Tenericutes
0.003546	414	1752716	Candidatus Dadabacteria
0.002955	345	1379697	candidate division Zixibacteria
0.002913	340	1798710	Candidatus Melainabacteria
0.002878	336	62680	Candidatus Marinimicrobia
0.002784	325	67817	Candidatus Aminicenantes
0.002578	301	1293497	Nitrospinae
0.002493	291	142187	Candidatus Hydrogenedentes
0.001953	228	200940	Thermodesulfobacteria
0.001859	217	200783	Aquificae
0.001842	215	95818	Candidatus Saccharibacteria
0.001688	197	74015	Candidatus Latescibacteria
0.001585	185	456828	Candidatus Cloacimonetes
0.001491	174	200930	Deferribacteres
0.001336	156	200918	Thermotogae
0.001216	142	200295	Candidatus Sumerlaeota
0.001165	136	65842	Fibrobacteres
0.001139	133	1817801	Candidatus Eisenbacteria
0.001037	121	1619053	Candidatus Peregrinibacteria
0.001011	118	640293	candidate division NC10
0.000899	105	1817808	Candidatus Margulisbacteria
0.000831	97	221216	Candidatus Parcubacteria
0.000814	95	2798537	Candidatus Blackallbacteria
0.000788	92	28889	Crenarchaeota
0.000762	89	200938	Chrysiogenetes
0.000660	77	1752731	Candidatus Magasanikbacteria
0.000651	76	1752734	Candidatus Kaiserbacteria
0.000642	75	1817806	Candidatus Handelsmanbacteria
0.000634	74	67818	Atribacterota
0.000625	73	1052815	Candidatus Aerophobetes
0.000608	71	1703755	candidate division WOR-3
0.000540	63	1752728	Candidatus Falkowbacteria
0.000523	61	1752732	Candidatus Uhrbacteria
0.000505	59	1706441	Candidatus Thorarchaeota
0.000505	59	1752723	Candidatus Roizmanbacteria
0.000497	58	1801616	Candidatus Woesearchaeota
0.000445	52	1817810	Candidatus Riflebacteria
0.000428	50	1752724	Candidatus Pacebacteria
0.000428	50	1752729	Candidatus Nomurabacteria
0.000428	50	1817811	Candidatus Schekmanbacteria
0.000428	50	1936272	Candidatus Heimdallarchaeota
0.000411	48	2093358	Candidatus Abyssubacteria
0.000394	46	1662329	Candidatus Kapabacteria
0.000377	44	67810	Candidatus Bipolaricaulota
0.000351	41	1817911	Candidatus Nealsonbacteria
0.000351	41	2052312	Candidatus Dormibacteraeota
0.000343	40	1819803	Candidatus Desantisbacteria
0.000334	39	422282	candidate division WWE3
0.000334	39	1655434	Candidatus Lokiarchaeota
0.000308	36	363464	Candidatus Gracilibacteria
0.000308	36	1752733	Candidatus Yanofskybacteria
0.000283	33	1729712	Candidatus Fermentibacteria
0.000274	32	67814	Caldiserica
0.000266	31	1154676	Candidatus Eremiobacteraeota
0.000266	31	2582935	Candidatus Altiarchaeota
0.000257	30	1752719	Candidatus Levybacteria
0.000248	29	743724	Candidatus Aenigmarchaeota
0.000248	29	1817805	Candidatus Glassbacteria
0.000240	28	1752722	Candidatus Woesebacteria
0.000223	26	1801631	Candidatus Micrarchaeota
0.000214	25	1752718	Candidatus Daviesbacteria
0.000214	25	2109258	Abditibacteriota
0.000180	21	1752720	Candidatus Gottesmanbacteria
0.000171	20	1817800	Candidatus Edwardsbacteria
0.000163	19	1618330	Candidatus Berkelbacteria
0.000154	18	1817799	Candidatus Doudnabacteria
0.000146	17	1817797	Candidatus Coatesbacteria
0.000146	17	1817807	Candidatus Lindowbacteria
0.000137	16	68297	Dictyoglomi
0.000137	16	1817903	Candidatus Buchananbacteria
0.000137	16	1855361	Candidatus Kryptonia
0.000137	16	2498705	Candidatus Cryosericota
0.000128	15	1752727	Candidatus Campbellbacteria
0.000128	15	1752741	Candidatus Azambacteria
0.000128	15	2093364	Candidatus Aureabacteria
0.000120	14	1752717	Candidatus Curtissbacteria
0.000120	14	1752721	Candidatus Shapirobacteria
0.000120	14	1752735	Candidatus Wolfebacteria
0.000120	14	1817913	Candidatus Portnoybacteria
0.000111	13	1618339	candidate division CPR2
0.000111	13	1817907	Candidatus Kerfeldbacteria
0.000103	12	1752725	Candidatus Collierbacteria
0.000103	12	1817916	Candidatus Staskawiczbacteria
0.000103	12	1817917	Candidatus Sungbacteria
0.000103	12	1817919	Candidatus Taylorbacteria
0.000103	12	2767197	Candidatus Muirbacteria
0.000094	11	1817920	Candidatus Terrybacteria
0.000094	11	2576005	candidate division LCP-89
0.000086	10	743725	Candidatus Diapherotrites
0.000086	10	1752740	Candidatus Kuenenbacteria
0.000086	10	1817812	Candidatus Wallbacteria
0.000086	10	1817908	Candidatus Komeilibacteria
0.000086	10	1817925	Candidatus Zambryskibacteria
0.000086	10	2703810	Candidatus Mcinerneyibacteriota
0.000077	9	1752726	Candidatus Beckwithbacteria
0.000077	9	1752730	Candidatus Amesbacteria
0.000077	9	1752738	Candidatus Giovannonibacteria
0.000069	8	67820	Candidatus Microgenomates
0.000069	8	192989	Nanoarchaeota
0.000069	8	1817804	Candidatus Fraserbacteria
0.000069	8	1817899	Candidatus Woykebacteria
0.000060	7	51967	Candidatus Korarchaeota
0.000060	7	1130266	Candidatus Hydrothermae
0.000060	7	1752736	Candidatus Adlerbacteria
0.000060	7	1817796	Candidatus Abawacabacteria
0.000060	7	1817803	Candidatus Fischerbacteria
0.000060	7	1817809	Candidatus Raymondbacteria
0.000060	7	1817905	Candidatus Harrisonbacteria
0.000060	7	1817922	Candidatus Vogelbacteria
0.000060	7	1978152	Candidatus Marsarchaeota
0.000060	7	2138240	Coprothermobacterota
0.000060	7	2798536	Candidatus Gribaldobacteria
0.000051	6	1817798	Candidatus Delongbacteria
0.000051	6	1817802	Candidatus Firestonebacteria
0.000051	6	1817924	Candidatus Yonathbacteria
0.000051	6	1915410	Candidatus Verstraetearchaeota
0.000051	6	2301208	Candidatus Cerribacteria
0.000043	5	1817901	Candidatus Andersenbacteria
0.000043	5	1817910	Candidatus Lloydbacteria
0.000043	5	1817923	Candidatus Wildermuthbacteria
0.000043	5	2013583	Candidatus Goldbacteria
0.000034	4	221235	Candidatus Absconditabacteria
0.000034	4	1817909	Candidatus Liptonbacteria
0.000034	4	1817912	Candidatus Niyogibacteria
0.000026	3	1462430	Candidatus Nanohaloarchaeota
0.000026	3	1752739	Candidatus Jorgensenbacteria
0.000026	3	1817918	Candidatus Tagabacteria
0.000026	3	1936271	Candidatus Odinarchaeota
0.000017	2	1935021	Candidatus Geothermarchaeota
0.000009	1	1817898	Candidatus Blackburnbacteria
0.000009	1	1817904	Candidatus Colwellbacteria
0.000009	1	1817914	Candidatus Ryanbacteria
0.000009	1	1817926	Candidatus Wirthbacteria
0.095822	11186	10239	Viruses
0.956310	111637	NA	cannot be assigned to a (non-viral) phylum
43120793	5033801	NA	unclassified
4.31749e+07

## Sheet: MS7
percent	reads	taxon_id	taxon_name
12207.9	1382938	1224	Proteobacteria
9074.25	1027949	976	Bacteroidetes
1452.57	164550	74201	Verrucomicrobia
0.481577	54554	203682	Planctomycetes
0.384563	43564	1117	Cyanobacteria
0.235951	26729	201174	Actinobacteria
0.210704	23869	1239	Firmicutes
0.064194	7272	200795	Chloroflexi
0.062543	7085	1936987	Balneolaeota
0.042584	4824	57723	Acidobacteria
0.034410	3898	134625	Kiritimatiellaeota
0.029934	3391	2283796	Candidatus Thermoplasmatota
0.029007	3286	203691	Spirochaetes
0.027736	3142	1853220	Rhodothermaeota
0.026182	2966	256845	Lentisphaerae
0.018511	2097	28890	Euryarchaeota
0.016172	1832	1134404	Ignavibacteriae
0.012712	1440	142182	Gemmatimonadetes
0.012111	1372	1930617	Calditrichaeota
0.011802	1337	40117	Nitrospirae
0.009022	1022	544448	Tenericutes
0.007186	814	1090	Chlorobi
0.006815	772	1297	Deinococcus-Thermus
0.006788	769	32066	Fusobacteria
0.006577	745	204428	Chlamydiae
0.006285	712	67812	Candidatus Omnitrophica
0.006162	698	928852	Candidatus Bathyarchaeota
0.005217	591	74152	Elusimicrobia
0.004661	528	651137	Thaumarchaeota
0.004529	513	62680	Candidatus Marinimicrobia
0.004008	454	1798710	Candidatus Melainabacteria
0.003813	432	67819	Armatimonadetes
0.003178	360	67817	Candidatus Aminicenantes
0.003116	353	456828	Candidatus Cloacimonetes
0.002966	336	1752708	Candidatus Rokubacteria
0.002887	327	142187	Candidatus Hydrogenedentes
0.002869	325	1802339	Candidatus Tectomicrobia
0.002842	322	1293497	Nitrospinae
0.002560	290	1752716	Candidatus Dadabacteria
0.002507	284	1379697	candidate division Zixibacteria
0.002251	255	200940	Thermodesulfobacteria
0.002127	241	200783	Aquificae
0.001871	212	200918	Thermotogae
0.001836	208	65842	Fibrobacteres
0.001836	208	1619053	Candidatus Peregrinibacteria
0.001730	196	508458	Synergistetes
0.001695	192	74015	Candidatus Latescibacteria
0.001589	180	1817808	Candidatus Margulisbacteria
0.001554	176	200930	Deferribacteres
0.001536	174	1703755	candidate division WOR-3
0.001465	166	265317	Candidatus Poribacteria
0.001156	131	1662329	Candidatus Kapabacteria
0.001130	128	95818	Candidatus Saccharibacteria
0.001103	125	221235	Candidatus Absconditabacteria
0.001050	119	1752731	Candidatus Magasanikbacteria
0.001042	118	28889	Crenarchaeota
0.001015	115	200295	Candidatus Sumerlaeota
0.000971	110	1801616	Candidatus Woesearchaeota
0.000945	107	221216	Candidatus Parcubacteria
0.000945	107	1752734	Candidatus Kaiserbacteria
0.000918	104	67818	Atribacterota
0.000900	102	743724	Candidatus Aenigmarchaeota
0.000900	102	1817911	Candidatus Nealsonbacteria
0.000865	98	1817801	Candidatus Eisenbacteria
0.000856	97	2798537	Candidatus Blackallbacteria
0.000803	91	1936272	Candidatus Heimdallarchaeota
0.000794	90	1655434	Candidatus Lokiarchaeota
0.000768	87	1752728	Candidatus Falkowbacteria
0.000742	84	1752737	Candidatus Moranbacteria
0.000697	79	1752724	Candidatus Pacebacteria
0.000671	76	1752723	Candidatus Roizmanbacteria
0.000636	72	1706441	Candidatus Thorarchaeota
0.000591	67	363464	Candidatus Gracilibacteria
0.000574	65	67814	Caldiserica
0.000574	65	422282	candidate division WWE3
0.000574	65	1752732	Candidatus Uhrbacteria
0.000565	64	200938	Chrysiogenetes
0.000512	58	640293	candidate division NC10
0.000477	54	1752729	Candidatus Nomurabacteria
0.000468	53	2013583	Candidatus Goldbacteria
0.000441	50	1817902	Candidatus Brennerbacteria
0.000424	48	1052815	Candidatus Aerophobetes
0.000415	47	1729712	Candidatus Fermentibacteria
0.000415	47	1752733	Candidatus Yanofskybacteria
0.000397	45	67810	Candidatus Bipolaricaulota
0.000380	43	1855361	Candidatus Kryptonia
0.000371	42	1817810	Candidatus Riflebacteria
0.000371	42	2093358	Candidatus Abyssubacteria
0.000335	38	1618330	Candidatus Berkelbacteria
0.000335	38	1817806	Candidatus Handelsmanbacteria
0.000335	38	1817811	Candidatus Schekmanbacteria
0.000327	37	2576005	candidate division LCP-89
0.000318	36	1752722	Candidatus Woesebacteria
0.000318	36	1817807	Candidatus Lindowbacteria
0.000309	35	1752720	Candidatus Gottesmanbacteria
0.000300	34	1817802	Candidatus Firestonebacteria
0.000291	33	1817812	Candidatus Wallbacteria
0.000274	31	1817798	Candidatus Delongbacteria
0.000274	31	1936271	Candidatus Odinarchaeota
0.000265	30	1752717	Candidatus Curtissbacteria
0.000265	30	1817799	Candidatus Doudnabacteria
0.000256	29	1752738	Candidatus Giovannonibacteria
0.000247	28	1154676	Candidatus Eremiobacteraeota
0.000247	28	1819803	Candidatus Desantisbacteria
0.000247	28	1978152	Candidatus Marsarchaeota
0.000230	26	1817916	Candidatus Staskawiczbacteria
0.000221	25	1817903	Candidatus Buchananbacteria
0.000194	22	1817908	Candidatus Komeilibacteria
0.000185	21	1817907	Candidatus Kerfeldbacteria
0.000177	20	1752718	Candidatus Daviesbacteria
0.000168	19	51967	Candidatus Korarchaeota
0.000168	19	1817797	Candidatus Coatesbacteria
0.000168	19	1817809	Candidatus Raymondbacteria
0.000159	18	1752741	Candidatus Azambacteria
0.000150	17	1462430	Candidatus Nanohaloarchaeota
0.000150	17	1817803	Candidatus Fischerbacteria
0.000150	17	2109258	Abditibacteriota
0.000150	17	2767197	Candidatus Muirbacteria
0.000141	16	1752727	Candidatus Campbellbacteria
0.000141	16	1752735	Candidatus Wolfebacteria
0.000141	16	1817922	Candidatus Vogelbacteria
0.000141	16	2093364	Candidatus Aureabacteria
0.000141	16	2582935	Candidatus Altiarchaeota
0.000132	15	1817925	Candidatus Zambryskibacteria
0.000124	14	1752719	Candidatus Levybacteria
0.000124	14	1752726	Candidatus Beckwithbacteria
0.000124	14	1817926	Candidatus Wirthbacteria
0.000115	13	67820	Candidatus Microgenomates
0.000115	13	1817919	Candidatus Taylorbacteria
0.000106	12	1801631	Candidatus Micrarchaeota
0.000106	12	1817899	Candidatus Woykebacteria
0.000106	12	2052312	Candidatus Dormibacteraeota
0.000097	11	68297	Dictyoglomi
0.000097	11	743725	Candidatus Diapherotrites
0.000097	11	1752740	Candidatus Kuenenbacteria
0.000097	11	1817800	Candidatus Edwardsbacteria
0.000097	11	1817805	Candidatus Glassbacteria
0.000088	10	1752721	Candidatus Shapirobacteria
0.000088	10	1752725	Candidatus Collierbacteria
0.000088	10	1752730	Candidatus Amesbacteria
0.000079	9	1130266	Candidatus Hydrothermae
0.000079	9	1817913	Candidatus Portnoybacteria
0.000079	9	1817918	Candidatus Tagabacteria
0.000079	9	1817920	Candidatus Terrybacteria
0.000079	9	1817923	Candidatus Wildermuthbacteria
0.000071	8	1618338	candidate division CPR1
0.000071	8	1817909	Candidatus Liptonbacteria
0.000071	8	1817917	Candidatus Sungbacteria
0.000071	8	1817924	Candidatus Yonathbacteria
0.000062	7	1618339	candidate division CPR2
0.000062	7	2138240	Coprothermobacterota
0.000053	6	1817804	Candidatus Fraserbacteria
0.000053	6	1817905	Candidatus Harrisonbacteria
0.000053	6	1817910	Candidatus Lloydbacteria
0.000053	6	1915410	Candidatus Verstraetearchaeota
0.000053	6	2798536	Candidatus Gribaldobacteria
0.000035	4	2498705	Candidatus Cryosericota
0.000026	3	192989	Nanoarchaeota
0.000026	3	1462422	Candidatus Parvarchaeota
0.000026	3	1704031	candidate division KD3-62
0.000026	3	1817901	Candidatus Andersenbacteria
0.000026	3	1817912	Candidatus Niyogibacteria
0.000026	3	1817914	Candidatus Ryanbacteria
0.000026	3	1935021	Candidatus Geothermarchaeota
0.000026	3	2703810	Candidatus Mcinerneyibacteriota
0.000018	2	1752739	Candidatus Jorgensenbacteria
0.000018	2	1817915	Candidatus Spechtbacteria
0.000009	1	1618340	candidate division CPR3
0.000009	1	1752736	Candidatus Adlerbacteria
0.000009	1	1817796	Candidatus Abawacabacteria
0.000009	1	1817898	Candidatus Blackburnbacteria
0.000009	1	1817904	Candidatus Colwellbacteria
0.000009	1	1935019	Candidatus Hydrothermarchaeota
0.245273	27785	10239	Viruses
0.730469	82749	NA	cannot be assigned to a (non-viral) phylum
74437761	8432456	NA	unclassified

## Sheet: MS8
percent	reads	taxon_id	taxon_name
17090.5	6726822	1224	Proteobacteria
16260.5	6400120	976	Bacteroidetes
1100.94	433328	74201	Verrucomicrobia
0.747721	294303	1239	Firmicutes
0.636357	250470	203682	Planctomycetes
0.447521	176144	1117	Cyanobacteria
0.339909	133788	201174	Actinobacteria
0.236934	93257	1936987	Balneolaeota
0.166558	65557	203691	Spirochaetes
0.116326	45786	200795	Chloroflexi
0.067106	26413	57723	Acidobacteria
0.044515	17521	544448	Tenericutes
0.041037	16152	32066	Fusobacteria
0.034276	13491	1134404	Ignavibacteriae
0.029881	11761	256845	Lentisphaerae
0.027896	10980	28890	Euryarchaeota
0.026278	10343	134625	Kiritimatiellaeota
0.023582	9282	2283796	Candidatus Thermoplasmatota
0.023389	9206	1853220	Rhodothermaeota
0.022645	8913	1930617	Calditrichaeota
0.019809	7797	142182	Gemmatimonadetes
0.018117	7131	40117	Nitrospirae
0.014157	5572	1090	Chlorobi
0.013493	5311	1297	Deinococcus-Thermus
0.010180	4007	204428	Chlamydiae
0.008526	3356	65842	Fibrobacteres
0.007838	3085	67812	Candidatus Omnitrophica
0.007505	2954	62680	Candidatus Marinimicrobia
0.006926	2726	74152	Elusimicrobia
0.006761	2661	651137	Thaumarchaeota
0.005549	2184	456828	Candidatus Cloacimonetes
0.005287	2081	928852	Candidatus Bathyarchaeota
0.005206	2049	67819	Armatimonadetes
0.004980	1960	1379697	candidate division Zixibacteria
0.004794	1887	200918	Thermotogae
0.004627	1821	67817	Candidatus Aminicenantes
0.004621	1819	1798710	Candidatus Melainabacteria
0.004111	1618	200783	Aquificae
0.004111	1618	1293497	Nitrospinae
0.003943	1552	1752708	Candidatus Rokubacteria
0.003730	1468	200940	Thermodesulfobacteria
0.003702	1457	508458	Synergistetes
0.003626	1427	1802339	Candidatus Tectomicrobia
0.003610	1421	1752716	Candidatus Dadabacteria
0.003592	1414	142187	Candidatus Hydrogenedentes
0.003384	1332	200930	Deferribacteres
0.003016	1187	1619053	Candidatus Peregrinibacteria
0.002553	1005	1752734	Candidatus Kaiserbacteria
0.002472	973	1662329	Candidatus Kapabacteria
0.002294	903	74015	Candidatus Latescibacteria
0.002083	820	265317	Candidatus Poribacteria
0.002033	800	221235	Candidatus Absconditabacteria
0.001941	764	1817808	Candidatus Margulisbacteria
0.001865	734	221216	Candidatus Parcubacteria
0.001829	720	2798537	Candidatus Blackallbacteria
0.001596	628	95818	Candidatus Saccharibacteria
0.001560	614	1703755	candidate division WOR-3
0.001557	613	200295	Candidatus Sumerlaeota
0.001519	598	1752731	Candidatus Magasanikbacteria
0.001418	558	67818	Atribacterota
0.001380	543	1801616	Candidatus Woesearchaeota
0.001296	510	1655434	Candidatus Lokiarchaeota
0.001156	455	1817801	Candidatus Eisenbacteria
0.001087	428	28889	Crenarchaeota
0.001049	413	200938	Chrysiogenetes
0.001034	407	1752723	Candidatus Roizmanbacteria
0.001006	396	1936272	Candidatus Heimdallarchaeota
0.000991	390	363464	Candidatus Gracilibacteria
0.000988	389	1752737	Candidatus Moranbacteria
0.000973	383	1752732	Candidatus Uhrbacteria
0.000887	349	1752728	Candidatus Falkowbacteria
0.000887	349	1817810	Candidatus Riflebacteria
0.000836	329	640293	candidate division NC10
0.000793	312	1706441	Candidatus Thorarchaeota
0.000762	300	1817911	Candidatus Nealsonbacteria
0.000737	290	1855361	Candidatus Kryptonia
0.000694	273	1752729	Candidatus Nomurabacteria
0.000650	256	1752724	Candidatus Pacebacteria
0.000622	245	1817809	Candidatus Raymondbacteria
0.000605	238	422282	candidate division WWE3
0.000589	232	1729712	Candidatus Fermentibacteria
0.000549	216	1752722	Candidatus Woesebacteria
0.000546	215	67814	Caldiserica
0.000541	213	1618330	Candidatus Berkelbacteria
0.000534	210	1817806	Candidatus Handelsmanbacteria
0.000523	206	1052815	Candidatus Aerophobetes
0.000506	199	1752733	Candidatus Yanofskybacteria
0.000506	199	1817812	Candidatus Wallbacteria
0.000501	197	743724	Candidatus Aenigmarchaeota
0.000465	183	67810	Candidatus Bipolaricaulota
0.000462	182	1817903	Candidatus Buchananbacteria
0.000460	181	2093358	Candidatus Abyssubacteria
0.000457	180	1752717	Candidatus Curtissbacteria
0.000457	180	1817811	Candidatus Schekmanbacteria
0.000434	171	1817798	Candidatus Delongbacteria
0.000422	166	2013583	Candidatus Goldbacteria
0.000401	158	1752720	Candidatus Gottesmanbacteria
0.000399	157	1817797	Candidatus Coatesbacteria
0.000391	154	1817907	Candidatus Kerfeldbacteria
0.000356	140	1817799	Candidatus Doudnabacteria
0.000338	133	2767197	Candidatus Muirbacteria
0.000320	126	1752719	Candidatus Levybacteria
0.000318	125	2052312	Candidatus Dormibacteraeota
0.000307	121	1817902	Candidatus Brennerbacteria
0.000300	118	2582935	Candidatus Altiarchaeota
0.000292	115	51967	Candidatus Korarchaeota
0.000290	114	1819803	Candidatus Desantisbacteria
0.000269	106	2109258	Abditibacteriota
0.000264	104	1752738	Candidatus Giovannonibacteria
0.000262	103	1817807	Candidatus Lindowbacteria
0.000249	98	1801631	Candidatus Micrarchaeota
0.000236	93	1154676	Candidatus Eremiobacteraeota
0.000229	90	2576005	candidate division LCP-89
0.000226	89	1817925	Candidatus Zambryskibacteria
0.000224	88	1936271	Candidatus Odinarchaeota
0.000206	81	1752727	Candidatus Campbellbacteria
0.000206	81	1817802	Candidatus Firestonebacteria
0.000206	81	1817919	Candidatus Taylorbacteria
0.000191	75	1817805	Candidatus Glassbacteria
0.000191	75	1817910	Candidatus Lloydbacteria
0.000185	73	67820	Candidatus Microgenomates
0.000183	72	68297	Dictyoglomi
0.000178	70	2093364	Candidatus Aureabacteria
0.000170	67	1130266	Candidatus Hydrothermae
0.000170	67	1752718	Candidatus Daviesbacteria
0.000168	66	1817923	Candidatus Wildermuthbacteria
0.000165	65	1817916	Candidatus Staskawiczbacteria
0.000160	63	1817913	Candidatus Portnoybacteria
0.000158	62	1752721	Candidatus Shapirobacteria
0.000152	60	743725	Candidatus Diapherotrites
0.000150	59	1817800	Candidatus Edwardsbacteria
0.000150	59	1817908	Candidatus Komeilibacteria
0.000147	58	1817917	Candidatus Sungbacteria
0.000145	57	1618338	candidate division CPR1
0.000145	57	1752735	Candidatus Wolfebacteria
0.000140	55	1817905	Candidatus Harrisonbacteria
0.000132	52	2703810	Candidatus Mcinerneyibacteriota
0.000127	50	1618339	candidate division CPR2
0.000124	49	1752726	Candidatus Beckwithbacteria
0.000119	47	1752741	Candidatus Azambacteria
0.000119	47	1817803	Candidatus Fischerbacteria
0.000117	46	1978152	Candidatus Marsarchaeota
0.000114	45	1817914	Candidatus Ryanbacteria
0.000112	44	1752739	Candidatus Jorgensenbacteria
0.000112	44	1817909	Candidatus Liptonbacteria
0.000109	43	1817924	Candidatus Yonathbacteria
0.000107	42	1752740	Candidatus Kuenenbacteria
0.000107	42	1817922	Candidatus Vogelbacteria
0.000104	41	1817901	Candidatus Andersenbacteria
0.000102	40	1817899	Candidatus Woykebacteria
0.000099	39	2498705	Candidatus Cryosericota
0.000094	37	1752725	Candidatus Collierbacteria
0.000079	31	1817912	Candidatus Niyogibacteria
0.000079	31	2138240	Coprothermobacterota
0.000076	30	1915410	Candidatus Verstraetearchaeota
0.000074	29	192989	Nanoarchaeota
0.000074	29	1462430	Candidatus Nanohaloarchaeota
0.000071	28	1817904	Candidatus Colwellbacteria
0.000066	26	1618340	candidate division CPR3
0.000066	26	1817915	Candidatus Spechtbacteria
0.000061	24	1752730	Candidatus Amesbacteria
0.000061	24	1817926	Candidatus Wirthbacteria
0.000058	23	1752736	Candidatus Adlerbacteria
0.000053	21	2301208	Candidatus Cerribacteria
0.000048	19	1817804	Candidatus Fraserbacteria
0.000046	18	1817900	Candidatus Chisholmbacteria
0.000041	16	1817918	Candidatus Tagabacteria
0.000041	16	1817920	Candidatus Terrybacteria
0.000038	15	1817796	Candidatus Abawacabacteria
0.000038	15	2798536	Candidatus Gribaldobacteria
0.000033	13	1935019	Candidatus Hydrothermarchaeota
0.000030	12	1935021	Candidatus Geothermarchaeota
0.000028	11	1704031	candidate division KD3-62
0.000020	8	1817898	Candidatus Blackburnbacteria
0.000010	4	2546568	Candidatus Nezhaarchaeota
0.000005	2	1462422	Candidatus Parvarchaeota
0.000003	1	2582950	Candidatus Huberarchaea
0.214091	84266	10239	Viruses
0.980590	385960	NA	cannot be assigned to a (non-viral) phylum
61072928	24038290	NA	unclassified

## Sheet: MS9
percent	reads	taxon_id	taxon_name
17856.8	1957709	1224	Proteobacteria
14526.6	1592603	976	Bacteroidetes
0.913963	100201	1239	Firmicutes
0.869816	95361	74201	Verrucomicrobia
0.472793	51834	1117	Cyanobacteria
0.311556	34157	203682	Planctomycetes
0.245044	26865	203691	Spirochaetes
0.237774	26068	201174	Actinobacteria
0.126239	13840	1936987	Balneolaeota
0.101848	11166	544448	Tenericutes
0.063183	6927	200795	Chloroflexi
0.059380	6510	2283796	Candidatus Thermoplasmatota
0.043727	4794	57723	Acidobacteria
0.035236	3863	32066	Fusobacteria
0.026078	2859	28890	Euryarchaeota
0.024992	2740	1134404	Ignavibacteriae
0.024691	2707	134625	Kiritimatiellaeota
0.018699	2050	256845	Lentisphaerae
0.014658	1607	40117	Nitrospirae
0.014585	1599	1853220	Rhodothermaeota
0.014083	1544	1930617	Calditrichaeota
0.013107	1437	142182	Gemmatimonadetes
0.011055	1212	1090	Chlorobi
0.010946	1200	204428	Chlamydiae
0.008857	971	456828	Candidatus Cloacimonetes
0.008191	898	67812	Candidatus Omnitrophica
0.007525	825	74152	Elusimicrobia
0.007406	812	1297	Deinococcus-Thermus
0.005874	644	142187	Candidatus Hydrogenedentes
0.005810	637	1798710	Candidatus Melainabacteria
0.005564	610	62680	Candidatus Marinimicrobia
0.005044	553	65842	Fibrobacteres
0.004661	511	200918	Thermotogae
0.004561	500	200930	Deferribacteres
0.003931	431	67819	Armatimonadetes
0.003922	430	928852	Candidatus Bathyarchaeota
0.003667	402	67817	Candidatus Aminicenantes
0.003548	389	1379697	candidate division Zixibacteria
0.003466	380	1293497	Nitrospinae
0.003384	371	508458	Synergistetes
0.003284	360	200783	Aquificae
0.002426	266	1752708	Candidatus Rokubacteria
0.002399	263	1619053	Candidatus Peregrinibacteria
0.002390	262	67818	Atribacterota
0.002390	262	651137	Thaumarchaeota
0.002271	249	1817911	Candidatus Nealsonbacteria
0.002244	246	1802339	Candidatus Tectomicrobia
0.002061	226	1817810	Candidatus Riflebacteria
0.001925	211	1817808	Candidatus Margulisbacteria
0.001906	209	200940	Thermodesulfobacteria
0.001760	193	265317	Candidatus Poribacteria
0.001605	176	1752716	Candidatus Dadabacteria
0.001560	171	28889	Crenarchaeota
0.001551	170	74015	Candidatus Latescibacteria
0.001541	169	1662329	Candidatus Kapabacteria
0.001514	166	1703755	candidate division WOR-3
0.001432	157	1752731	Candidatus Magasanikbacteria
0.001332	146	1752723	Candidatus Roizmanbacteria
0.001295	142	2013583	Candidatus Goldbacteria
0.001277	140	1817902	Candidatus Brennerbacteria
0.001231	135	1618330	Candidatus Berkelbacteria
0.001213	133	1801616	Candidatus Woesearchaeota
0.001204	132	1936271	Candidatus Odinarchaeota
0.001158	127	200295	Candidatus Sumerlaeota
0.001122	123	221216	Candidatus Parcubacteria
0.001058	116	95818	Candidatus Saccharibacteria
0.000967	106	1655434	Candidatus Lokiarchaeota
0.000930	102	1752737	Candidatus Moranbacteria
0.000912	100	422282	candidate division WWE3
0.000903	99	2798537	Candidatus Blackallbacteria
0.000894	98	1752734	Candidatus Kaiserbacteria
0.000867	95	1752732	Candidatus Uhrbacteria
0.000821	90	200938	Chrysiogenetes
0.000803	88	1817801	Candidatus Eisenbacteria
0.000775	85	221235	Candidatus Absconditabacteria
0.000757	83	1936272	Candidatus Heimdallarchaeota
0.000730	80	1752724	Candidatus Pacebacteria
0.000657	72	743724	Candidatus Aenigmarchaeota
0.000657	72	1855361	Candidatus Kryptonia
0.000648	71	67810	Candidatus Bipolaricaulota
0.000648	71	1706441	Candidatus Thorarchaeota
0.000620	68	67814	Caldiserica
0.000593	65	1052815	Candidatus Aerophobetes
0.000584	64	363464	Candidatus Gracilibacteria
0.000584	64	1752729	Candidatus Nomurabacteria
0.000566	62	1752722	Candidatus Woesebacteria
0.000566	62	1752733	Candidatus Yanofskybacteria
0.000556	61	640293	candidate division NC10
0.000520	57	1752728	Candidatus Falkowbacteria
0.000447	49	1752720	Candidatus Gottesmanbacteria
0.000447	49	1819803	Candidatus Desantisbacteria
0.000410	45	1817812	Candidatus Wallbacteria
0.000401	44	1729712	Candidatus Fermentibacteria
0.000383	42	2093358	Candidatus Abyssubacteria
0.000374	41	1154676	Candidatus Eremiobacteraeota
0.000374	41	1817798	Candidatus Delongbacteria
0.000365	40	2582935	Candidatus Altiarchaeota
0.000356	39	1817811	Candidatus Schekmanbacteria
0.000328	36	1752738	Candidatus Giovannonibacteria
0.000328	36	1817806	Candidatus Handelsmanbacteria
0.000328	36	1817809	Candidatus Raymondbacteria
0.000319	35	1817907	Candidatus Kerfeldbacteria
0.000301	33	2767197	Candidatus Muirbacteria
0.000292	32	1817799	Candidatus Doudnabacteria
0.000265	29	1817903	Candidatus Buchananbacteria
0.000265	29	2052312	Candidatus Dormibacteraeota
0.000255	28	1817797	Candidatus Coatesbacteria
0.000255	28	2576005	candidate division LCP-89
0.000228	25	1817925	Candidatus Zambryskibacteria
0.000219	24	51967	Candidatus Korarchaeota
0.000210	23	1752721	Candidatus Shapirobacteria
0.000201	22	67820	Candidatus Microgenomates
0.000201	22	1752717	Candidatus Curtissbacteria
0.000201	22	1752719	Candidatus Levybacteria
0.000201	22	1817922	Candidatus Vogelbacteria
0.000182	20	743725	Candidatus Diapherotrites
0.000182	20	1618338	candidate division CPR1
0.000182	20	1817802	Candidatus Firestonebacteria
0.000182	20	1817805	Candidatus Glassbacteria
0.000182	20	1817807	Candidatus Lindowbacteria
0.000155	17	1462430	Candidatus Nanohaloarchaeota
0.000155	17	1618339	candidate division CPR2
0.000155	17	1752726	Candidatus Beckwithbacteria
0.000155	17	1752727	Candidatus Campbellbacteria
0.000155	17	1752730	Candidatus Amesbacteria
0.000155	17	1801631	Candidatus Micrarchaeota
0.000155	17	1817919	Candidatus Taylorbacteria
0.000155	17	2498705	Candidatus Cryosericota
0.000146	16	1817899	Candidatus Woykebacteria
0.000146	16	1935019	Candidatus Hydrothermarchaeota
0.000128	14	68297	Dictyoglomi
0.000119	13	1752718	Candidatus Daviesbacteria
0.000109	12	1752725	Candidatus Collierbacteria
0.000109	12	1817800	Candidatus Edwardsbacteria
0.000109	12	1817916	Candidatus Staskawiczbacteria
0.000100	11	192989	Nanoarchaeota
0.000100	11	1752740	Candidatus Kuenenbacteria
0.000100	11	1817909	Candidatus Liptonbacteria
0.000091	10	1817804	Candidatus Fraserbacteria
0.000091	10	1915410	Candidatus Verstraetearchaeota
0.000091	10	2093364	Candidatus Aureabacteria
0.000091	10	2109258	Abditibacteriota
0.000082	9	1817905	Candidatus Harrisonbacteria
0.000082	9	1978152	Candidatus Marsarchaeota
0.000073	8	1130266	Candidatus Hydrothermae
0.000073	8	1817904	Candidatus Colwellbacteria
0.000073	8	1817908	Candidatus Komeilibacteria
0.000073	8	1817913	Candidatus Portnoybacteria
0.000073	8	1817920	Candidatus Terrybacteria
0.000073	8	1817923	Candidatus Wildermuthbacteria
0.000073	8	2703810	Candidatus Mcinerneyibacteriota
0.000064	7	1752736	Candidatus Adlerbacteria
0.000064	7	1817796	Candidatus Abawacabacteria
0.000055	6	1752735	Candidatus Wolfebacteria
0.000055	6	1752739	Candidatus Jorgensenbacteria
0.000055	6	1817803	Candidatus Fischerbacteria
0.000055	6	1817901	Candidatus Andersenbacteria
0.000055	6	1817910	Candidatus Lloydbacteria
0.000055	6	1817912	Candidatus Niyogibacteria
0.000055	6	1817914	Candidatus Ryanbacteria
0.000055	6	1817917	Candidatus Sungbacteria
0.000046	5	1752741	Candidatus Azambacteria
0.000046	5	1817924	Candidatus Yonathbacteria
0.000046	5	2138240	Coprothermobacterota
0.000046	5	2798536	Candidatus Gribaldobacteria
0.000036	4	1935021	Candidatus Geothermarchaeota
0.000027	3	1704031	candidate division KD3-62
0.000027	3	1817918	Candidatus Tagabacteria
0.000027	3	1817926	Candidatus Wirthbacteria
0.000027	3	2301208	Candidatus Cerribacteria
0.000018	2	1618340	candidate division CPR3
0.000018	2	1817915	Candidatus Spechtbacteria
0.000009	1	1817898	Candidatus Blackburnbacteria
0.000009	1	2546568	Candidatus Nezhaarchaeota
0.250763	27492	10239	Viruses
1714275	187942	NA	cannot be assigned to a (non-viral) phylum
61837685	6779484	NA	unclassified

## Sheet: MS10
percent	reads	taxon_id	taxon_name
31078.3	3417362	976	Bacteroidetes
17020.2	1871539	1224	Proteobacteria
0.833149	91613	203682	Planctomycetes
0.638278	70185	74201	Verrucomicrobia
0.423973	46620	1117	Cyanobacteria
0.261696	28776	1936987	Balneolaeota
0.245217	26964	201174	Actinobacteria
0.187987	20671	1239	Firmicutes
0.079174	8706	200795	Chloroflexi
0.076019	8359	57723	Acidobacteria
0.043452	4778	1853220	Rhodothermaeota
0.034112	3751	1134404	Ignavibacteriae
0.030593	3364	142182	Gemmatimonadetes
0.029120	3202	203691	Spirochaetes
0.021517	2366	1930617	Calditrichaeota
0.019898	2188	134625	Kiritimatiellaeota
0.017179	1889	28890	Euryarchaeota
0.014578	1603	40117	Nitrospirae
0.012641	1390	256845	Lentisphaerae
0.011877	1306	1090	Chlorobi
0.011522	1267	928852	Candidatus Bathyarchaeota
0.010195	1121	204428	Chlamydiae
0.009167	1008	1297	Deinococcus-Thermus
0.009031	993	2283796	Candidatus Thermoplasmatota
0.008603	946	62680	Candidatus Marinimicrobia
0.007148	786	200940	Thermodesulfobacteria
0.006475	712	32066	Fusobacteria
0.005966	656	67819	Armatimonadetes
0.005293	582	67812	Candidatus Omnitrophica
0.005247	577	651137	Thaumarchaeota
0.005129	564	67817	Candidatus Aminicenantes
0.004965	546	1379697	candidate division Zixibacteria
0.004875	536	74152	Elusimicrobia
0.004611	507	1752716	Candidatus Dadabacteria
0.004120	453	544448	Tenericutes
0.004020	442	1752708	Candidatus Rokubacteria
0.003738	411	1293497	Nitrospinae
0.003538	389	1798710	Candidatus Melainabacteria
0.003438	378	456828	Candidatus Cloacimonetes
0.003065	337	1802339	Candidatus Tectomicrobia
0.002737	301	200783	Aquificae
0.002528	278	74015	Candidatus Latescibacteria
0.002483	273	142187	Candidatus Hydrogenedentes
0.002428	267	1662329	Candidatus Kapabacteria
0.002228	245	200918	Thermotogae
0.002228	245	200930	Deferribacteres
0.001919	211	508458	Synergistetes
0.001910	210	265317	Candidatus Poribacteria
0.001892	208	1752734	Candidatus Kaiserbacteria
0.001746	192	2798537	Candidatus Blackallbacteria
0.001582	174	1619053	Candidatus Peregrinibacteria
0.001546	170	65842	Fibrobacteres
0.001328	146	1817801	Candidatus Eisenbacteria
0.001300	143	221216	Candidatus Parcubacteria
0.001264	139	200295	Candidatus Sumerlaeota
0.001255	138	95818	Candidatus Saccharibacteria
0.001246	137	1817808	Candidatus Margulisbacteria
0.001219	134	1752731	Candidatus Magasanikbacteria
0.001091	120	1703755	candidate division WOR-3
0.001019	112	1936272	Candidatus Heimdallarchaeota
0.000964	106	1752737	Candidatus Moranbacteria
0.000946	104	1706441	Candidatus Thorarchaeota
0.000809	89	200938	Chrysiogenetes
0.000791	87	28889	Crenarchaeota
0.000764	84	67818	Atribacterota
0.000764	84	1655434	Candidatus Lokiarchaeota
0.000737	81	640293	candidate division NC10
0.000718	79	1801616	Candidatus Woesearchaeota
0.000709	78	1752732	Candidatus Uhrbacteria
0.000691	76	1855361	Candidatus Kryptonia
0.000628	69	1729712	Candidatus Fermentibacteria
0.000609	67	1752728	Candidatus Falkowbacteria
0.000555	61	1752723	Candidatus Roizmanbacteria
0.000555	61	1752729	Candidatus Nomurabacteria
0.000509	56	1052815	Candidatus Aerophobetes
0.000509	56	1752720	Candidatus Gottesmanbacteria
0.000500	55	1817811	Candidatus Schekmanbacteria
0.000464	51	1817907	Candidatus Kerfeldbacteria
0.000437	48	363464	Candidatus Gracilibacteria
0.000409	45	422282	candidate division WWE3
0.000409	45	1817798	Candidatus Delongbacteria
0.000382	42	1752722	Candidatus Woesebacteria
0.000373	41	1817797	Candidatus Coatesbacteria
0.000346	38	1817806	Candidatus Handelsmanbacteria
0.000346	38	1817810	Candidatus Riflebacteria
0.000336	37	743724	Candidatus Aenigmarchaeota
0.000318	35	2576005	candidate division LCP-89
0.000309	34	1752719	Candidatus Levybacteria
0.000300	33	1752717	Candidatus Curtissbacteria
0.000291	32	1752724	Candidatus Pacebacteria
0.000291	32	1817903	Candidatus Buchananbacteria
0.000291	32	2093358	Candidatus Abyssubacteria
0.000273	30	221235	Candidatus Absconditabacteria
0.000264	29	1618330	Candidatus Berkelbacteria
0.000255	28	67814	Caldiserica
0.000246	27	67810	Candidatus Bipolaricaulota
0.000227	25	1154676	Candidatus Eremiobacteraeota
0.000227	25	1817809	Candidatus Raymondbacteria
0.000218	24	2052312	Candidatus Dormibacteraeota
0.000218	24	2767197	Candidatus Muirbacteria
0.000209	23	1752727	Candidatus Campbellbacteria
0.000209	23	1752735	Candidatus Wolfebacteria
0.000209	23	2582935	Candidatus Altiarchaeota
0.000200	22	68297	Dictyoglomi
0.000200	22	1817799	Candidatus Doudnabacteria
0.000200	22	1817812	Candidatus Wallbacteria
0.000191	21	51967	Candidatus Korarchaeota
0.000191	21	1817800	Candidatus Edwardsbacteria
0.000191	21	1817911	Candidatus Nealsonbacteria
0.000182	20	2109258	Abditibacteriota
0.000173	19	1817807	Candidatus Lindowbacteria
0.000173	19	1817919	Candidatus Taylorbacteria
0.000173	19	1817925	Candidatus Zambryskibacteria
0.000164	18	1752733	Candidatus Yanofskybacteria
0.000155	17	1752721	Candidatus Shapirobacteria
0.000155	17	1752740	Candidatus Kuenenbacteria
0.000155	17	1817805	Candidatus Glassbacteria
0.000155	17	2013583	Candidatus Goldbacteria
0.000146	16	1801631	Candidatus Micrarchaeota
0.000127	14	1130266	Candidatus Hydrothermae
0.000127	14	1752718	Candidatus Daviesbacteria
0.000118	13	1752725	Candidatus Collierbacteria
0.000118	13	1817905	Candidatus Harrisonbacteria
0.000109	12	1752738	Candidatus Giovannonibacteria
0.000109	12	1752739	Candidatus Jorgensenbacteria
0.000109	12	1817803	Candidatus Fischerbacteria
0.000109	12	1817901	Candidatus Andersenbacteria
0.000109	12	1817917	Candidatus Sungbacteria
0.000109	12	2093364	Candidatus Aureabacteria
0.000109	12	2498705	Candidatus Cryosericota
0.000100	11	1618339	candidate division CPR2
0.000100	11	1817913	Candidatus Portnoybacteria
0.000091	10	67820	Candidatus Microgenomates
0.000091	10	1817908	Candidatus Komeilibacteria
0.000091	10	1817922	Candidatus Vogelbacteria
0.000091	10	1817923	Candidatus Wildermuthbacteria
0.000091	10	1817924	Candidatus Yonathbacteria
0.000082	9	1817910	Candidatus Lloydbacteria
0.000082	9	2703810	Candidatus Mcinerneyibacteriota
0.000073	8	1817802	Candidatus Firestonebacteria
0.000073	8	1817899	Candidatus Woykebacteria
0.000064	7	1817920	Candidatus Terrybacteria
0.000064	7	1817926	Candidatus Wirthbacteria
0.000064	7	1819803	Candidatus Desantisbacteria
0.000055	6	192989	Nanoarchaeota
0.000055	6	1752741	Candidatus Azambacteria
0.000055	6	2138240	Coprothermobacterota
0.000045	5	1618338	candidate division CPR1
0.000045	5	1817909	Candidatus Liptonbacteria
0.000045	5	1936271	Candidatus Odinarchaeota
0.000045	5	2798536	Candidatus Gribaldobacteria
0.000036	4	1462430	Candidatus Nanohaloarchaeota
0.000036	4	1752730	Candidatus Amesbacteria
0.000036	4	1817804	Candidatus Fraserbacteria
0.000036	4	1817914	Candidatus Ryanbacteria
0.000036	4	1817916	Candidatus Staskawiczbacteria
0.000027	3	1752736	Candidatus Adlerbacteria
0.000027	3	1817796	Candidatus Abawacabacteria
0.000027	3	1817900	Candidatus Chisholmbacteria
0.000027	3	1817902	Candidatus Brennerbacteria
0.000027	3	1915410	Candidatus Verstraetearchaeota
0.000027	3	2301208	Candidatus Cerribacteria
0.000027	3	2546568	Candidatus Nezhaarchaeota
0.000018	2	1618340	candidate division CPR3
0.000018	2	1752726	Candidatus Beckwithbacteria
0.000018	2	1817918	Candidatus Tagabacteria
0.000018	2	1978152	Candidatus Marsarchaeota
0.000009	1	743725	Candidatus Diapherotrites
0.000009	1	1462422	Candidatus Parvarchaeota
0.000009	1	1704031	candidate division KD3-62
0.000009	1	1817898	Candidatus Blackburnbacteria
0.000009	1	1817904	Candidatus Colwellbacteria
0.000009	1	1817912	Candidatus Niyogibacteria
0.000009	1	1817915	Candidatus Spechtbacteria
0.000009	1	2582950	Candidatus Huberarchaea
0.171408	18848	10239	Viruses
1000574	110023	NA	cannot be assigned to a (non-viral) phylum
47568303	5230604	NA	unclassified

## Sheet: MS11
percent	reads	taxon_id	taxon_name
26286	3190617	976	Bacteroidetes
15530.2	1885071	1224	Proteobacteria
0.765845	92959	203682	Planctomycetes
0.450112	54635	74201	Verrucomicrobia
0.254529	30895	201174	Actinobacteria
0.254472	30888	1117	Cyanobacteria
0.166814	20248	1239	Firmicutes
0.060858	7387	200795	Chloroflexi
0.057175	6940	1936987	Balneolaeota
0.045221	5489	57723	Acidobacteria
0.027319	3316	1853220	Rhodothermaeota
0.022615	2745	203691	Spirochaetes
0.016634	2019	1134404	Ignavibacteriae
0.015521	1884	28890	Euryarchaeota
0.015068	1829	142182	Gemmatimonadetes
0.011971	1453	928852	Candidatus Bathyarchaeota
0.010603	1287	1930617	Calditrichaeota
0.010306	1251	32066	Fusobacteria
0.010249	1244	204428	Chlamydiae
0.010018	1216	40117	Nitrospirae
0.009647	1171	1297	Deinococcus-Thermus
0.009211	1118	134625	Kiritimatiellaeota
0.009095	1104	2283796	Candidatus Thermoplasmatota
0.007563	918	256845	Lentisphaerae
0.006418	779	1090	Chlorobi
0.006121	743	1798710	Candidatus Melainabacteria
0.004729	574	2798537	Candidatus Blackallbacteria
0.004301	522	544448	Tenericutes
0.004169	506	62680	Candidatus Marinimicrobia
0.003913	475	67819	Armatimonadetes
0.003889	472	67812	Candidatus Omnitrophica
0.003534	429	1752716	Candidatus Dadabacteria
0.003444	418	74152	Elusimicrobia
0.003164	384	1752708	Candidatus Rokubacteria
0.002867	348	1802339	Candidatus Tectomicrobia
0.002645	321	200940	Thermodesulfobacteria
0.002595	315	1379697	candidate division Zixibacteria
0.002480	301	95818	Candidatus Saccharibacteria
0.002315	281	1293497	Nitrospinae
0.002249	273	67817	Candidatus Aminicenantes
0.002084	253	200783	Aquificae
0.002043	248	142187	Candidatus Hydrogenedentes
0.002010	244	651137	Thaumarchaeota
0.001788	217	1752734	Candidatus Kaiserbacteria
0.001689	205	456828	Candidatus Cloacimonetes
0.001664	202	508458	Synergistetes
0.001623	197	200918	Thermotogae
0.001574	191	1619053	Candidatus Peregrinibacteria
0.001466	178	1703755	candidate division WOR-3
0.001368	166	200930	Deferribacteres
0.001368	166	265317	Candidatus Poribacteria
0.001359	165	221216	Candidatus Parcubacteria
0.001343	163	74015	Candidatus Latescibacteria
0.001104	134	65842	Fibrobacteres
0.001063	129	1752737	Candidatus Moranbacteria
0.000931	113	1817808	Candidatus Margulisbacteria
0.000849	103	1936272	Candidatus Heimdallarchaeota
0.000832	101	1817801	Candidatus Eisenbacteria
0.000799	97	1752731	Candidatus Magasanikbacteria
0.000783	95	200295	Candidatus Sumerlaeota
0.000758	92	1801616	Candidatus Woesearchaeota
0.000700	85	1752732	Candidatus Uhrbacteria
0.000684	83	1662329	Candidatus Kapabacteria
0.000676	82	1706441	Candidatus Thorarchaeota
0.000651	79	640293	candidate division NC10
0.000610	74	363464	Candidatus Gracilibacteria
0.000577	70	1052815	Candidatus Aerophobetes
0.000552	67	1752729	Candidatus Nomurabacteria
0.000544	66	422282	candidate division WWE3
0.000527	64	200938	Chrysiogenetes
0.000519	63	28889	Crenarchaeota
0.000519	63	1752728	Candidatus Falkowbacteria
0.000478	58	67818	Atribacterota
0.000470	57	743724	Candidatus Aenigmarchaeota
0.000395	48	1752723	Candidatus Roizmanbacteria
0.000395	48	1855361	Candidatus Kryptonia
0.000379	46	1752722	Candidatus Woesebacteria
0.000371	45	1817810	Candidatus Riflebacteria
0.000354	43	1655434	Candidatus Lokiarchaeota
0.000354	43	1752724	Candidatus Pacebacteria
0.000338	41	1817812	Candidatus Wallbacteria
0.000305	37	1817911	Candidatus Nealsonbacteria
0.000288	35	1817811	Candidatus Schekmanbacteria
0.000280	34	2093358	Candidatus Abyssubacteria
0.000272	33	1729712	Candidatus Fermentibacteria
0.000272	33	1817797	Candidatus Coatesbacteria
0.000272	33	1817923	Candidatus Wildermuthbacteria
0.000264	32	1817903	Candidatus Buchananbacteria
0.000255	31	1817806	Candidatus Handelsmanbacteria
0.000247	30	1817798	Candidatus Delongbacteria
0.000231	28	67810	Candidatus Bipolaricaulota
0.000214	26	1817919	Candidatus Taylorbacteria
0.000206	25	1817799	Candidatus Doudnabacteria
0.000198	24	51967	Candidatus Korarchaeota
0.000198	24	1618330	Candidatus Berkelbacteria
0.000198	24	1752738	Candidatus Giovannonibacteria
0.000189	23	1752727	Candidatus Campbellbacteria
0.000181	22	1752720	Candidatus Gottesmanbacteria
0.000173	21	1752733	Candidatus Yanofskybacteria
0.000173	21	2576005	candidate division LCP-89
0.000173	21	2767197	Candidatus Muirbacteria
0.000165	20	1752719	Candidatus Levybacteria
0.000157	19	67814	Caldiserica
0.000157	19	221235	Candidatus Absconditabacteria
0.000157	19	1752739	Candidatus Jorgensenbacteria
0.000157	19	1817809	Candidatus Raymondbacteria
0.000157	19	1817908	Candidatus Komeilibacteria
0.000148	18	1817907	Candidatus Kerfeldbacteria
0.000140	17	1752717	Candidatus Curtissbacteria
0.000140	17	1819803	Candidatus Desantisbacteria
0.000140	17	2582935	Candidatus Altiarchaeota
0.000132	16	67820	Candidatus Microgenomates
0.000132	16	1752735	Candidatus Wolfebacteria
0.000132	16	1817805	Candidatus Glassbacteria
0.000132	16	1817922	Candidatus Vogelbacteria
0.000124	15	1752718	Candidatus Daviesbacteria
0.000115	14	68297	Dictyoglomi
0.000115	14	1154676	Candidatus Eremiobacteraeota
0.000115	14	1817924	Candidatus Yonathbacteria
0.000115	14	1978152	Candidatus Marsarchaeota
0.000107	13	1817905	Candidatus Harrisonbacteria
0.000107	13	2109258	Abditibacteriota
0.000099	12	1817917	Candidatus Sungbacteria
0.000099	12	2052312	Candidatus Dormibacteraeota
0.000091	11	1752725	Candidatus Collierbacteria
0.000091	11	1817914	Candidatus Ryanbacteria
0.000091	11	2013583	Candidatus Goldbacteria
0.000091	11	2093364	Candidatus Aureabacteria
0.000082	10	1752740	Candidatus Kuenenbacteria
0.000082	10	1801631	Candidatus Micrarchaeota
0.000082	10	1817803	Candidatus Fischerbacteria
0.000082	10	1817807	Candidatus Lindowbacteria
0.000082	10	1817925	Candidatus Zambryskibacteria
0.000074	9	1752741	Candidatus Azambacteria
0.000074	9	1817901	Candidatus Andersenbacteria
0.000074	9	1817909	Candidatus Liptonbacteria
0.000074	9	1817913	Candidatus Portnoybacteria
0.000074	9	1817915	Candidatus Spechtbacteria
0.000074	9	1817916	Candidatus Staskawiczbacteria
0.000074	9	2138240	Coprothermobacterota
0.000074	9	2301208	Candidatus Cerribacteria
0.000066	8	1130266	Candidatus Hydrothermae
0.000066	8	1752730	Candidatus Amesbacteria
0.000066	8	1817800	Candidatus Edwardsbacteria
0.000058	7	1752721	Candidatus Shapirobacteria
0.000058	7	1752736	Candidatus Adlerbacteria
0.000058	7	1936271	Candidatus Odinarchaeota
0.000058	7	2703810	Candidatus Mcinerneyibacteriota
0.000049	6	1618339	candidate division CPR2
0.000049	6	1752726	Candidatus Beckwithbacteria
0.000049	6	1817912	Candidatus Niyogibacteria
0.000049	6	1817920	Candidatus Terrybacteria
0.000049	6	1817926	Candidatus Wirthbacteria
0.000049	6	1915410	Candidatus Verstraetearchaeota
0.000041	5	743725	Candidatus Diapherotrites
0.000041	5	1817802	Candidatus Firestonebacteria
0.000041	5	1817900	Candidatus Chisholmbacteria
0.000041	5	1817904	Candidatus Colwellbacteria
0.000033	4	1817804	Candidatus Fraserbacteria
0.000033	4	1817899	Candidatus Woykebacteria
0.000033	4	1817910	Candidatus Lloydbacteria
0.000033	4	2798536	Candidatus Gribaldobacteria
0.000025	3	1618338	candidate division CPR1
0.000025	3	1704031	candidate division KD3-62
0.000025	3	2498705	Candidatus Cryosericota
0.000016	2	192989	Nanoarchaeota
0.000016	2	1618340	candidate division CPR3
0.000016	2	1817796	Candidatus Abawacabacteria
0.000008	1	2582950	Candidatus Huberarchaea
0.505401	61346	10239	Viruses
0.793494	96315	NA	cannot be assigned to a (non-viral) phylum
54536480	6619686	NA	unclassified

[truncated: 5 more sheets: Msu_Y1, Msu_Y2, GEB, SAR, CB]
