# Supplementary material for: Exploring the Microbiome of Marmara Sea Mucilage: A Shotgun Metagenomics Study
Source: Preprints.org preprint supplement (doi:10.20944/preprints202303.0290.v1), 2023-03-15
Supplement: Supplementary file 2 [file Supplement 1.xlsx]

## Sheet: Supplement 1
		Samples	Sampling point	Coordinates
		MS1	Çanakkale-Kumkale	40° 0' 0.48" K 26° 14' 20.37" D
		MS2	Bandirma Gulf	40° 21' 22.09" K 27° 57' 3.95" D
		MS3	Gökçeada - Laz Bay	40° 05' 55.612" K 25° 47' 04.485" D
		MS4	West Marmara	40° 32' 55.02" K 27° 12' 30.00" D
		MS5	East Marmara	40°57'52.02" K 27° 44' 30.00" D
		MS6	Bursa	40°21'23.48" K 28°55'32.85" D
		MS7	Çanakkale	40° 8' 52.96" K 26° 23' 54.80" D
		MS8	Çardak	40° 22' 42.78" K 26° 42' 48.08" D
		MS9	Çanakkale-Kepez	40° 6' 12.54" K 26° 23' 26.71" D
		MS10	İstanbul Bostanci	40° 57' 3.55" K 29° 5' 45.22" D
		MS11	İstanbul Kartal	40° 53' 9.67" K 29° 11' 9.58" D
		Msu-Y1	İstanbul Kartal	40° 53' 0.04" K 29° 11' 53.47" D
		Msu-Y2	Büyük Ada-Viran Bağ	40° 50' 28.69" K 29° 6' 43.71" D
		GEB	Gelibolu	40° 23' 50.0" N 26° 39' 10.1'' E
		SAR	Gulf of Saros	40°30'32.0" N 26°41'36.3'' E
		CB	Çanakkale Strait	40°07'36.7" N 26°22'55.0'' E
